# Supplementary material for: Suspended sediment and discharge dynamics in a glacierized alpine environment: Identifying crucial areas and time periods on several spatial and temporal scales in the Ötztal, Austria
Source: Copernicus journal article supplement (doi:10.5194/esurf-2021-85), 2022-01-11

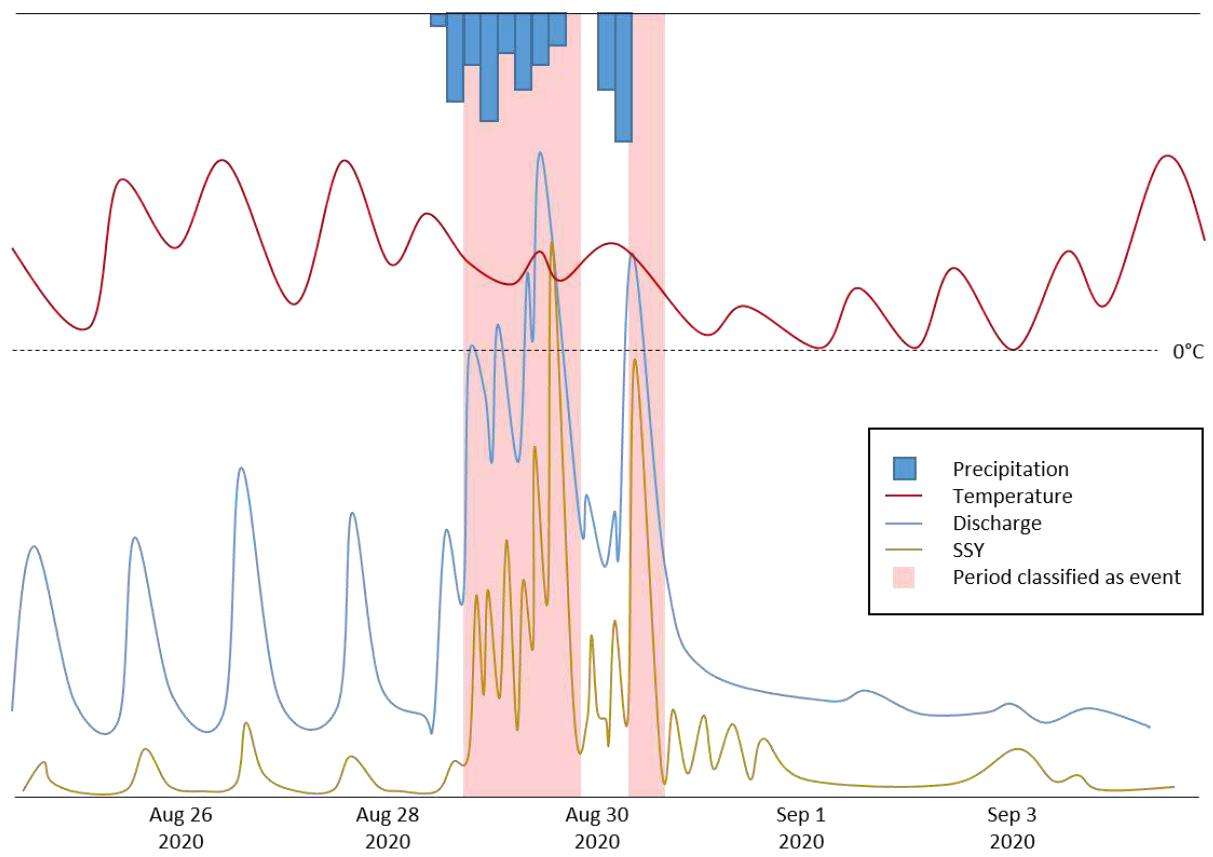

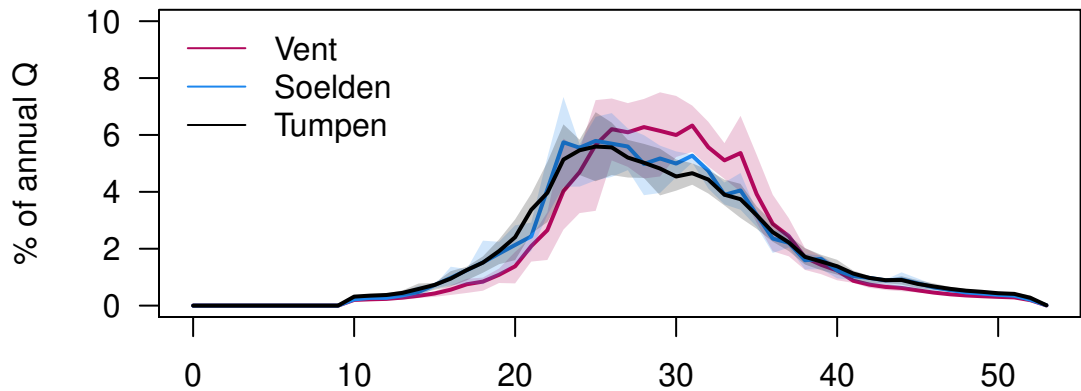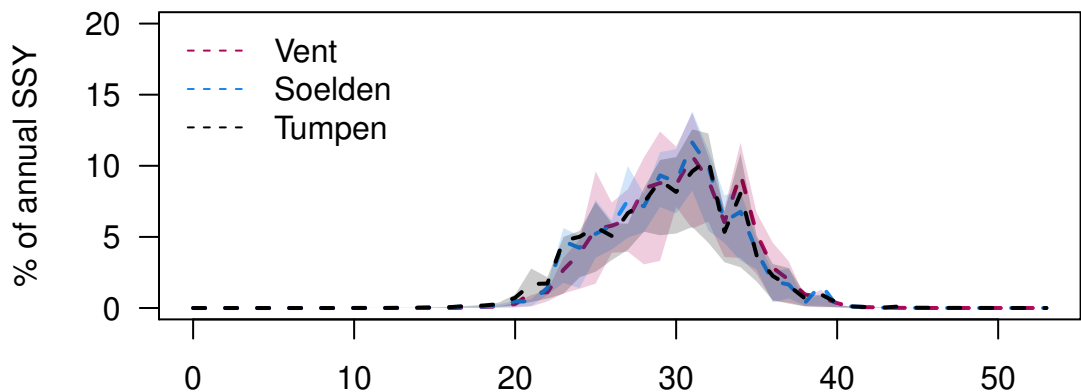

Week of year

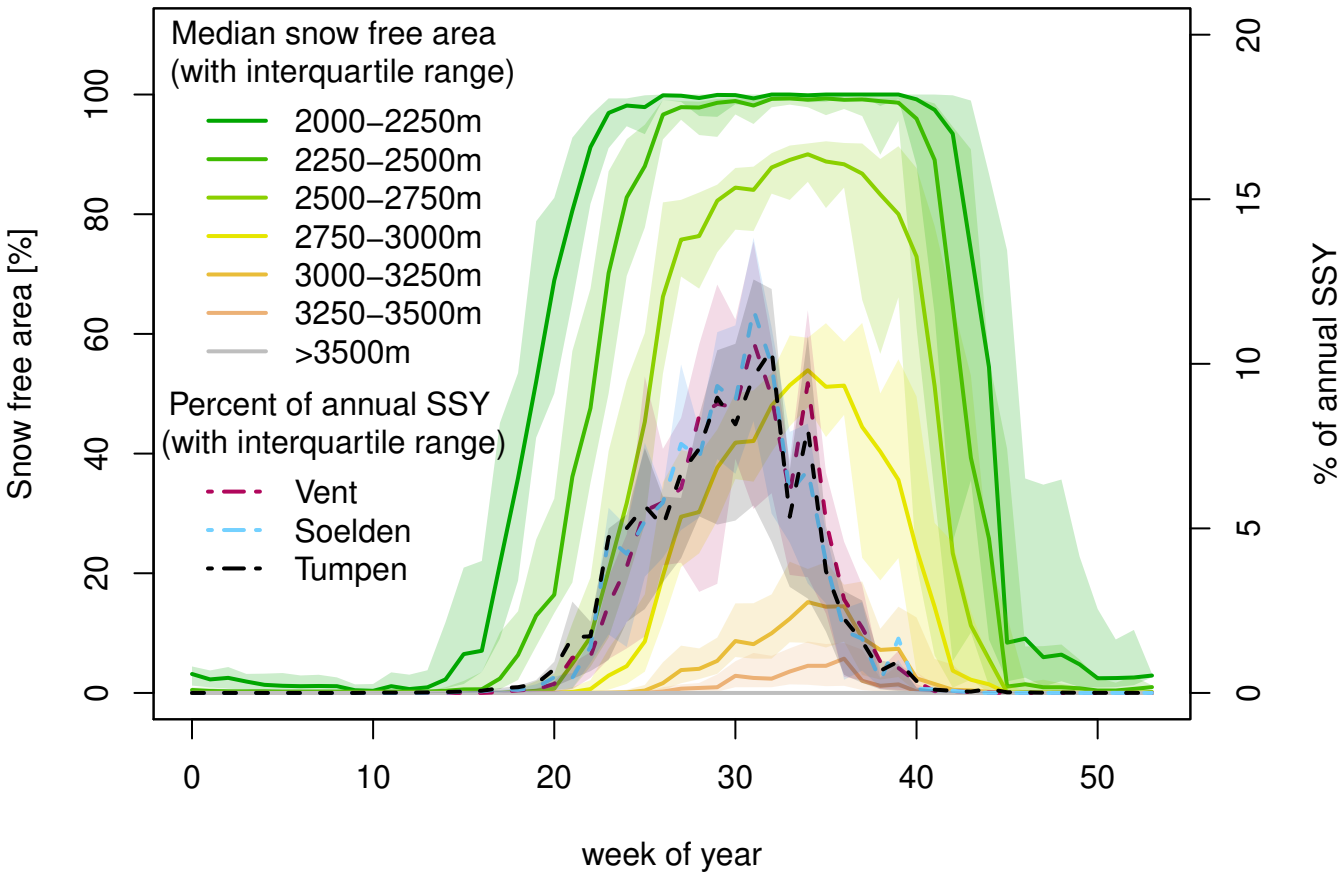

Supplement: Supplementary file [file esurf-2021-85-AC1-supplement.pdf]
